# Supplementary material for: Cost-effectiveness models for Alzheimer’s disease and related dementias: IPECAD modeling workshop cross-comparison challenge
Source: PubMed Central journal article supplement — Alzheimers Dement. Author manuscript; Available in PMC 2023 May 13. (PMC10126209; doi:10.1002/alz.12811), 2022-10-25
Supplement: NIHMS1852410-supplement-Supplement_1.pdf [file NIHMS1852410-supplement-Supplement_1.pdf]

*Supplemental material 5 corresponding to manuscript: “Cost-effectiveness Models for Alzheimer’s disease and related dementias: IPECAD Modelling Workshop Cross Comparison Challenge”. See [www.ipecad.org](http://www.ipecad.org).*

# Comparison of Cost-Effectiveness/Disease Progression (Health Economic) Models in Alzheimer's Disease

NETWORK Meeting, 2020

## Aim

The key objective of this meeting is to systematically examine cross-model differences in predicted outcomes, with structured discussion in relation to model design choices and parameterization.

If possible, we intend to publish the meeting's findings: describe our methodology (common scenario, participant selection, short overview of participating models) and results (descriptive statistics on key/selected model outcomes), and discuss challenges, limitations and future steps.

## Preparation to send in

1. **1 Sept. 2020:** Please send your model outcomes preferably in July/August, but at least before 1 Sept. 2020 (see work plan for details <https://ipecadgroup.files.wordpress.com/2020/01/ipecad-model-cross-comparison-2020-01-28.pdf>).
2. **14 Sept. 2020:** OPTIONAL/RECOMMENDED: As we have very limited time during the workshop itself, we strongly encourage you to record a presentation of your model that participants can review in advance. This way we can use the time available at the workshop for questions and clarifications. Please send a short (5-10 minute) pre-recorded presentation on your model. Please make sure to include:
  - a. Description of the model population
  - b. Key underlying data sources
  - c. Basic model mechanics (e.g. disease progression, mortality, etc.)
  - d. How treatment effect is implemented
  - e. (please take into account key/primary outcomes stated below)
  - f. (advise on recording options: see below the agenda some instructions)
3. **17 Sept. 2020:** Please send slides for your 'live' presentation to be given as scheduled in the agenda below. Feel free to highlight as you wish. Please use max. 8 minutes for presentation and min. 2 minutes for questions.

Please send all requested materials to [ron.handels@maastrichtuniversity.nl](mailto:ron.handels@maastrichtuniversity.nl)

## Preparation materials to review

**14/15 Sept. 2020:** The IPECAD modelling steering committee will share

1. all submitted model outcomes (table 1-3 from work plan)
2. all pre-recorded presentations
3. (link to materials shared by email)

Please make yourself familiar with this material as this will be the core material that will drive the discussions (except for the zip with model publications, this is meant only for your own consideration/reference).

## Model overview

| A: starting in MCI      | B: starting in dementia  |
|-------------------------|--------------------------|
| IPECAD (various)        | Jutkowitz et al. (Brown) |
| SVEDEM (KI)             | ADACE (Evidera)          |
| KP (KI)                 | CEM (Eli Lilly)          |
| FEM (USC)               | CPEC (LSE)               |
| ADACE (Evidera)         |                          |
| Herring et al. (RTI-HS) |                          |
| BASQDEM (Osakidetza)    |                          |
| MISCAN (Erasmus MC)     |                          |
| Davis et al. (ME)       |                          |
| CPEC (LSE)              |                          |

## Selected key/priority outcomes for comparison and discussion:

1. Life expectancy
  - a. Mean **life expectancy** in control strategy over 10-year time horizon.
  - b. **Proportion dead** each year in control strategy over 20-year time horizon.
2. Time in MCI/mild-dementia
  - a. Mean **time in MCI** (scenario A) **or mild dementia** (scenario B) in control strategy over 10-year time horizon.
  - b. **Proportion in MCI** (scenario A) **or mild dementia** (scenario B) each year in control strategy over 20-year time horizon.
3. **Differences in above 4 outcomes** between control and intervention strategy.

## Starting – end time

- Afternoon (time zone = +2 Central Europe) around 15:00 – 18:30h
- Afternoon (time zone = +1 UK) around 14:00 – 17:30h
- Morning (time zone = -4 US east coast) around 09:00 – 12:30h
- Very early morning (time zone = -6 CA mid) around 07:00 – 10:30h
- Very early morning (time zone = -7 US west coast) around 06:00 – 09:30h

## Agenda – day 1 (17 Sept. 2020)

| <i>Time (minutes)</i> | <i>Topic</i>                                                                                                                                                                                                                                                                                                                                                                                                                                                                                                                                                                                                                                  | <i>Presenter [chair]<br/>AG notes</i>    |
|-----------------------|-----------------------------------------------------------------------------------------------------------------------------------------------------------------------------------------------------------------------------------------------------------------------------------------------------------------------------------------------------------------------------------------------------------------------------------------------------------------------------------------------------------------------------------------------------------------------------------------------------------------------------------------------|------------------------------------------|
| <b>15:00-15:10</b>    | <b>Welcome</b>                                                                                                                                                                                                                                                                                                                                                                                                                                                                                                                                                                                                                                | <b>Bengt Winblad &amp; Ron Handels</b>   |
| <b>15:10-15:20</b>    | <b>Cross-comparison results part A</b>                                                                                                                                                                                                                                                                                                                                                                                                                                                                                                                                                                                                        | <b>Ron Handels</b>                       |
| <b>15:20-16:10</b>    | <b>Overview of models in part A</b>                                                                                                                                                                                                                                                                                                                                                                                                                                                                                                                                                                                                           | <b>[Anders Wimo]</b>                     |
|                       | IPECAD (UoE/KI/UM/QR)                                                                                                                                                                                                                                                                                                                                                                                                                                                                                                                                                                                                                         | Colin Green                              |
|                       | Herring et al. (RTI-HS)                                                                                                                                                                                                                                                                                                                                                                                                                                                                                                                                                                                                                       | Will Herring                             |
|                       | ADACE (Evidera)                                                                                                                                                                                                                                                                                                                                                                                                                                                                                                                                                                                                                               | Ali Tafazzoli                            |
|                       | Davis et al. (ME)                                                                                                                                                                                                                                                                                                                                                                                                                                                                                                                                                                                                                             | Scott Johnson                            |
|                       | CPEC (LSE)                                                                                                                                                                                                                                                                                                                                                                                                                                                                                                                                                                                                                                    | Robert Anderson                          |
| <b>16:10-16:20</b>    | <b>Clarifications</b>                                                                                                                                                                                                                                                                                                                                                                                                                                                                                                                                                                                                                         | <b>[Anders Wimo]</b>                     |
| <b>16:20-16:40</b>    | <b>Break</b>                                                                                                                                                                                                                                                                                                                                                                                                                                                                                                                                                                                                                                  |                                          |
| <b>16:40-17:30</b>    | <b>Overview of models in part A (continue)</b>                                                                                                                                                                                                                                                                                                                                                                                                                                                                                                                                                                                                | <b>[Andreas Karlsson]</b>                |
|                       | SVEDEM (KI)                                                                                                                                                                                                                                                                                                                                                                                                                                                                                                                                                                                                                                   | Anders Wimo                              |
|                       | KP (KI)                                                                                                                                                                                                                                                                                                                                                                                                                                                                                                                                                                                                                                       | Anders Wimo                              |
|                       | FEM (USC)                                                                                                                                                                                                                                                                                                                                                                                                                                                                                                                                                                                                                                     | Bryan Tysinger                           |
|                       | BASQDEM (Osakidetza)                                                                                                                                                                                                                                                                                                                                                                                                                                                                                                                                                                                                                          | Javier Mar                               |
|                       | MISCAN (Erasmus MC)                                                                                                                                                                                                                                                                                                                                                                                                                                                                                                                                                                                                                           | Chiara Bruck                             |
| <b>17:30-17:40</b>    | <b>Clarifications</b>                                                                                                                                                                                                                                                                                                                                                                                                                                                                                                                                                                                                                         | <b>[Andreas Karlsson]</b>                |
| <b>17:40-17:50</b>    | <b>Break</b>                                                                                                                                                                                                                                                                                                                                                                                                                                                                                                                                                                                                                                  |                                          |
| <b>17:50-18:20</b>    | <p><b>Discussion on prior presentations on benchmarking process and results</b></p> <ol style="list-style-type: none"> <li>1. How did you manage applying the reference case?</li> <li>2. Results: <ul style="list-style-type: none"> <li>○ How do you interpret the variation in the key/priority outcomes (small/large)?</li> <li>○ What are the strongest drivers of this variation (please focus on design choices and parameterization e.g. population, setting, mortality, disease progression, treatment operationalization, model assumptions)?</li> </ul> </li> </ol> <p><i>Feel free to simultaneously respond in the chat.</i></p> | <b>[Ron Handels &amp; Linus Jönsson]</b> |
| <b>18:20-18:30</b>    | <b>Summary &amp; closing</b>                                                                                                                                                                                                                                                                                                                                                                                                                                                                                                                                                                                                                  | <b>Colin Green &amp; Bengt Winblad</b>   |
|                       | <i>IPECAD Team available over time period (30 mins) to speak individually to any participants on individual basis</i>                                                                                                                                                                                                                                                                                                                                                                                                                                                                                                                         |                                          |

## Agenda – day 2 (18 Sept. 2020)

| <i>Time<br/>(minutes)</i> | <i>Topic</i>                                                                                                                                                                                                                                                                                                                                                                                                                                                                                                                                                                         | <i>Person [chair]<br/>AK notes</i>               |
|---------------------------|--------------------------------------------------------------------------------------------------------------------------------------------------------------------------------------------------------------------------------------------------------------------------------------------------------------------------------------------------------------------------------------------------------------------------------------------------------------------------------------------------------------------------------------------------------------------------------------|--------------------------------------------------|
| <b>15:00-15:10</b>        | <b>Welcome back &amp; recap yesterday</b>                                                                                                                                                                                                                                                                                                                                                                                                                                                                                                                                            | <b>Linus Jönsson &amp;<br/>Colin Green</b>       |
| <b>15:10-15:20</b>        | <b>Cross-comparison results part B</b>                                                                                                                                                                                                                                                                                                                                                                                                                                                                                                                                               | <b>Ron Handels</b>                               |
| <b>15:20-16:00</b>        | <b>Overview of models in part B</b>                                                                                                                                                                                                                                                                                                                                                                                                                                                                                                                                                  | <b>[Ron Handels]</b>                             |
| 10                        | Jutkowitz et al. (Brown)                                                                                                                                                                                                                                                                                                                                                                                                                                                                                                                                                             | Eric Jutkowitz                                   |
| 10                        | CEM (Eli Lilly)                                                                                                                                                                                                                                                                                                                                                                                                                                                                                                                                                                      | Mark Belger                                      |
| 10                        | ADACE (Evidera)                                                                                                                                                                                                                                                                                                                                                                                                                                                                                                                                                                      | Ali Tafazzoli                                    |
| 10                        | CPEC (LSE)                                                                                                                                                                                                                                                                                                                                                                                                                                                                                                                                                                           | Robert Anderson                                  |
| <b>16:00-16:30</b>        | <b>Discussion</b><br>(same questions as previous discussion)                                                                                                                                                                                                                                                                                                                                                                                                                                                                                                                         | <b>[Colin Green &amp;<br/>Anders Gustavsson]</b> |
| <b>16:30-16:40</b>        | <b>Break</b>                                                                                                                                                                                                                                                                                                                                                                                                                                                                                                                                                                         |                                                  |
| <b>16:40-17:20</b>        | <b>Break-out session</b>                                                                                                                                                                                                                                                                                                                                                                                                                                                                                                                                                             | [IPECAD modelling<br>steering]                   |
| 16:40-17:00               | Discuss in 5 groups of 4 persons <ol style="list-style-type: none"> <li>1. What steps to take/prioritize to better understand the causes of cross-model variation?</li> <li>2. What uniformity/standardization in inputs, assumptions and reported outcomes by models would you suggest?</li> <li>3. What evidence development is needed to implement trial effectiveness into a model?</li> <li>4. Future steps: what should be done for next year's workshop?</li> </ol> <p><i>Please summarize your findings in the chat (supported by IPECAD modelling steering member).</i></p> |                                                  |
| 17:00-17:20               | Summary from break-out session and overall discussion (all participants)                                                                                                                                                                                                                                                                                                                                                                                                                                                                                                             | Linus Jönsson &<br>Anders Gustavsson             |
| <b>17:20-17:35</b>        | <b>Next steps &amp; actions</b>                                                                                                                                                                                                                                                                                                                                                                                                                                                                                                                                                      | <b>Ron Handels</b>                               |
| <b>17:35-17:45</b>        | <b>Closing</b>                                                                                                                                                                                                                                                                                                                                                                                                                                                                                                                                                                       | <b>Bengt Winblad</b>                             |
| <b>17:45-18:05</b>        | <b>(Optional) Availability for participants for individual communication</b>                                                                                                                                                                                                                                                                                                                                                                                                                                                                                                         |                                                  |
| <b>20</b>                 | <b>(Optional) IPECAD Team available (30 mins) to speak individually to any participants on individual basis</b>                                                                                                                                                                                                                                                                                                                                                                                                                                                                      |                                                  |

You should have received a link to our shared folder where you can upload your presentations as well as any other supporting documentation you would like to share. If you have trouble accessing the folder please let us know.

## Attendees

| First name | Last name    | Organization                                    | Country | Model name       |
|------------|--------------|-------------------------------------------------|---------|------------------|
| Colin      | Green        | University of Exeter                            | UK      | IPECAD           |
| Ron        | Handels      | Maastricht University;<br>Karolinska Institutet | NL      | IPECAD           |
| Linus      | Jönsson      | Karolinska Institutet                           | SE      | IPECAD           |
| Anders     | Gustavsson   | QuantifyResearch;<br>Karolinska Institutet      | SE      | IPECAD           |
| Anders     | Wimo         | Karolinska Institutet                           | SE      | SVEDEM           |
| Anders     | Sköldunger   | Karolinska Institutet                           | SE      | KP               |
| Bengt      | Winblad      | Karolinska Institutet                           | SE      | IPECAD           |
| Andreas    | Karlsson     | Karolinska Institutet                           | SE      | IPECAD           |
| Eldon      | Spackman     | University of Calgary                           | CA      | n/a              |
| Eric       | Jutkowitz    | Brown                                           | US      | Jutkowitz et al. |
| Mauricio   | Lopez Mendez | Brown                                           | US      | Jutkowitz et al. |
| Peter      | Shewmaker    | Brown                                           | US      | Jutkowitz et al. |
| Jakub      | Hlávka       | University of Southern<br>California            | US      | FEM              |
| Bryan      | Tysinger     | University of Southern<br>California            | US      | FEM              |
| Pei-Jung   | Lin          | Tufts Medical Center                            | US      | n/a              |
| Will       | Herring      | RTI Health Solutions                            | US      | Herring et al.   |
| Jorgen     | Moller       | Evidera                                         | UK / US | ADACE            |
| Ali        | Tafazzoli    | Evidera                                         | UK / US | ADACE            |
| Mark       | Belger       | Eli Lilly                                       | UK      | CEM              |
| Michael    | Happich      | Eli Lilly                                       | DE      | CEM              |
| Javier     | Mar          | Basque Health Service                           | ES      | BASQDEM          |
| Myriam     | Soto-Gordoa  | Mondragon Unibertsitatea                        | ES      | BASQDEM          |
| Inge       | de Kok       | Erasmus MC                                      | NL      | MISCAN           |
| Chiara     | Brück        | Erasmus MC                                      | NL      | MISCAN           |
| Matthew    | Davis        | Medicus Economics                               | US      | Davis et al.     |
| Scott      | Johnson      | Medicus Economics                               | US      | Davis et al.     |
| Robert     | Espinosa     | Medicus Economics                               | US      | Davis et al.     |
| Robert     | Anderson     | London School of<br>Economics                   | UK      | CPEC             |
| Raphael    | Wittenberg   | London School of<br>Economics                   | UK      | CPEC             |
