# Supplementary material for: Cost-effectiveness models for Alzheimer’s disease and related dementias: IPECAD modeling workshop cross-comparison challenge
Source: PubMed Central journal article supplement — Alzheimers Dement. Author manuscript; Available in PMC 2023 May 13. (PMC10126209; doi:10.1002/alz.12811), 2022-10-25
Supplement: NIHMS1852410-supplement-Supplement_6.pdf [file NIHMS1852410-supplement-Supplement_6.pdf]

*Supplemental material 2 corresponding to manuscript: “Cost-effectiveness Models for Alzheimer’s disease and related dementias: IPECAD Modelling Workshop Cross Comparison Challenge”. See [www.ipecad.org](http://www.ipecad.org).*

**Workshop on Health Economic Modelling in AD**

Stockholm September 19-20, 2019

Background

We have a growing literature describing a wide range of health economic models that have been developed to evaluate treatments and diagnostics for Alzheimer's disease (Nguyen et al, 2018, Gustavsson et al 2017, Green & Zhang 2016, Cohen & Neumann 2008). In the literature there is considerable variability in the choice of model structure, disease states, outcomes and data sources. There is often a lack of transparency in published reports, and models are difficult to compare, due to key differences across disease models, and limited alignment on key methodological issues. This may limit the usefulness of these models in future HTA processes and other decision-making contexts related to pharmacological or other interventions for AD.

Objectives

The aim of this workshop is to bring together those who are research active in the field of Alzheimer's disease decision-modelling, in terms of developing modelling methods in the context of cost-effectiveness analyses and health technology assessment, or disease progression models that may be used in this way.

The long-term goal is to create a dedicated forum for exchange of ideas on health economic modeling in AD, to discuss and align on key methodological issues and to foster the development of robust and transparent models to guide decision making around novel treatment scenarios/pathways for AD. We therefore plan for this workshop to be the first of a future series of meetings and activities to further the development of modelling methods, and the identification of data to populate decision-models, in the area of AD. Whilst the initial focus is on AD, we hope to be able to extend the scope of our future activity into and across related dementias, and across the full diagnostic and treatment pathways associated with dementia. We wish to encourage and facilitate, where possible, a greater number of open access modeling studies/frameworks in AD.

## Agenda

Thursday September 19

|             |                                                                                                            |                            |
|-------------|------------------------------------------------------------------------------------------------------------|----------------------------|
| Morning     | Welcome and registration with coffee/tea                                                                   |                            |
|             |                                                                                                            |                            |
| 08.30-08.45 | Welcome and introductions                                                                                  | B Winblad                  |
| 08:45-09.00 | Workshop objectives and program                                                                            | L Jönsson                  |
|             |                                                                                                            |                            |
|             | <b>Session 1: overview of modelling in AD</b>                                                              | <b>Chair: A Gustavsson</b> |
| 09.00-09.30 | The song remains the same: Recurring themes and persistent challenges in Alzheimer's Disease modeling      | W Herring                  |
| 09.30-10.00 | ROADMAP review of HE and disease models and proposed model specification                                   | R Handels                  |
| 10:00-10:30 | <i>Coffee Break</i>                                                                                        |                            |
|             |                                                                                                            |                            |
|             | <b>Session 2: approaches to disease modelling in AD</b>                                                    | <b>Chair: R Handels</b>    |
| 10.30-11.00 | The IPECAD model                                                                                           | C Green                    |
| 11.00-11.30 | Modeling Nondrug Dementia Interventions in the United States Using a Dementia Simulation Model             | E Jutkowitz                |
| 11.30-12.00 | Modelling time to institutionalization                                                                     | M Belger                   |
| 12.00-12.30 | Finding a common baseline: the pattern of cognitive decline in Alzheimer disease                           | L L Raket                  |
| 12.30-13.30 | <i>Lunch</i>                                                                                               |                            |
| 13.30-14.00 | Estimating Transition Probabilities Using a Measure of Dependence for Patients with Alzheimer 's Disease   | E Spackman                 |
| 14.00-14.30 | The AD-ACE model: Benefits and challenges of modeling on an individual level                               | J Möller                   |
| 14.30-15.00 | Biomarker based prognosis for patients with mild cognitive impairment: the ABIDE project                   | I van Maurik               |
| 15:00-15:30 | Discussion on key issues in AD modelling                                                                   | Organizing committee & All |
| 15:30-16:00 | <i>Coffee Break</i>                                                                                        |                            |
| 16.00-16.40 | Model sharing and joint development: experience from the Mount Hood Challenge                              | M Willis                   |
|             |                                                                                                            |                            |
|             | <b>Session 3: data on cost of illness, progression and diagnostics</b>                                     | <b>Chair: A Wimo</b>       |
| 16.40-17.00 | The Mayo Clinic Study of Aging – a population-based longitudinal study on cognitive decline and impairment | M Vassilaki                |
| 17.00-17.20 | Healthcare and Social impact of dementia-related neuropsychiatric symptoms.                                | J Mar Medina               |
| 17.20-17.40 | Towards cost-efficient data-driven differential diagnostics in neurodegenerative diseases                  | J Lötjönen                 |
| 17.40-18.00 | Access to Future Alzheimer's Therapies and Value of Blood-Based Tests                                      | J Hlavka                   |
|             |                                                                                                            |                            |
| 18.00       | Adjourn                                                                                                    |                            |
| 19.00       | Dinner                                                                                                     |                            |

Friday September 20

|                    |                                                                                               |                      |
|--------------------|-----------------------------------------------------------------------------------------------|----------------------|
| <i>08.00-09.00</i> | <i>Breakfast</i>                                                                              |                      |
| 09.00-09.15        | Introduction to group work                                                                    | L Jönsson            |
| 09.15-10.30        | Group work: identifying key issues in AD modeling & defining scenarios for model benchmarking | All                  |
| <i>10:30-11:00</i> | <i>Coffee Break</i>                                                                           |                      |
| 11.00-12.30        | Group presentations and discussion in plenum                                                  | L Jönsson            |
| <i>12.30-13.30</i> | <i>Lunch</i>                                                                                  |                      |
| 13.30-15.00        | Summary / concluding remarks / final discussion points /next steps                            | Organizing committee |
|                    |                                                                                               |                      |
| 15.00              | Adjourn and departures                                                                        |                      |
